# Supplementary material for: Factors Associated with Increased Neuroretinal Rim Thickness Measured Based on Bruch’s Membrane Opening-Minimum Rim Width after Trabeculectomy
Source: MDPI journal article supplement (doi:10.3390/jcm10163646), 2021-08-18
Supplement: s1 [file s1]

**Supplementary Table S1.** Factors associated with an increase in the average RNFL thickness (per 10  $\mu\text{m}$ ) after trabeculectomy.

| Variables                                               | Univariate             |                 | Multivariate           |                 |
|---------------------------------------------------------|------------------------|-----------------|------------------------|-----------------|
|                                                         | Beta (95% CI)          | <i>p</i> -Value | Beta (95% CI)          | <i>p</i> -Value |
| Age, per 10-year older                                  | −0.01 (−0.20 to 0.20)  | 0.89            |                        |                 |
| Gender, male                                            | 0.31 (−0.47 to 1.10)   | 0.43            |                        |                 |
| Diabetes                                                | 0.38 (−0.34 to 1.11)   | 0.31            |                        |                 |
| Hypertension                                            | 0.60 (−0.17 to 1.37)   | 0.13            |                        |                 |
| Phakia/pseudophakia                                     | −0.16 (−0.87 to 0.55)  | 0.66            |                        |                 |
| Duration, months                                        | −0.22 (−0.40 to −0.05) | <b>0.02</b>     | −0.18 (−0.34 to −0.02) | <b>0.04</b>     |
| Central corneal thickness, 40 $\mu\text{m}$             | 0.30 (−0.06 to 0.64)   | 0.11            |                        |                 |
| Axial length, mm                                        | −0.16 (−0.43 to 0.10)  | 0.22            |                        |                 |
| Visual field MD, dB                                     | −0.02 (−0.06 to 0.03)  | 0.48            |                        |                 |
| Visual field PSD, dB                                    | −0.06 (−0.17 to 0.05)  | 0.29            |                        |                 |
| Preoperative average RNFL thickness, 10 $\mu\text{m}$   | −0.24 (−0.38 to −0.10) | <b>0.001</b>    | −0.21 (−0.35 to −0.08) | <b>0.003</b>    |
| Preoperative global BMO-MRW thickness, 10 $\mu\text{m}$ | −0.24 (−0.10 to 0.05)  | 0.52            |                        |                 |
| Preoperative IOP, mmHg                                  | 0.05 (0.00 to 0.10)    | <b>0.05</b>     | 0.03 (−0.02 to 0.07)   | 0.26            |
| Postoperative IOP, mmHg                                 | −0.01 (−0.10 to 0.08)  | 0.77            |                        |                 |
| Reduction of IOP, mmHg                                  | 0.03 (−0.01 to 0.07)   | 0.13            |                        |                 |

IOP: intraocular pressure; MD: mean deviation; PSD: pattern standard deviation; dB: decibel; RNFL: retinal nerve fiber layer; BMO-MRW: Bruch's membrane opening minimum rim width; Beta coefficients were calculated based on the 10  $\mu\text{m}$  increase in the average RNFL thickness; Statistically significant *p*-values are shown in bold.
